# Supplementary material for: Proactive versus Rank-Down Topical Corticosteroid Therapy for Maintenance of Remission in Pediatric Atopic Dermatitis: A Randomized, Open-Label, Active-Controlled, Parallel-Group Study (Anticipate Study)
Source: J Clin Med. 2022 Oct 31;11(21):6477. doi: 10.3390/jcm11216477 (PMC9658234; doi:10.3390/jcm11216477)
Supplement: Supplementary file 1 [file jcm-11-06477-s001.zip › SuppInfo_Supplemental Table S1.pdf]

**Supplemental Table S1.** Blood test results: Group mean data.

|                                                      | Proactive<br>therapy group<br>( <i>n</i> = 24) | <i>p</i> <sup>†</sup> : vs. start of<br>maintenance<br>treatment | Rank-down<br>therapy group<br>( <i>n</i> = 25) | <i>p</i> <sup>†</sup> : vs. start of<br>maintenance<br>treatment | <i>p</i> <sup>‡</sup> : Between-<br>group<br>comparison |
|------------------------------------------------------|------------------------------------------------|------------------------------------------------------------------|------------------------------------------------|------------------------------------------------------------------|---------------------------------------------------------|
| Atopic dermatitis-related<br>biomarkers              |                                                |                                                                  |                                                |                                                                  |                                                         |
| Serum total IgE, mean ± SD,<br>IU/mL                 |                                                |                                                                  |                                                |                                                                  |                                                         |
| At start of maintenance<br>treatment                 | 1598 ± 1529<br>( <i>n</i> = 4)                 | -                                                                | 1590 ± 2359<br>( <i>n</i> = 3)                 | -                                                                | -                                                       |
| Peripheral blood eosinophil<br>count, mean ± SD, /μL |                                                |                                                                  |                                                |                                                                  |                                                         |
| At start of maintenance<br>treatment                 | 512.0 ± 384.6<br>( <i>n</i> = 4)               | -                                                                | 313.4 ± 417.5<br>( <i>n</i> = 3)               | -                                                                | <i>p</i> = 0.4795                                       |
| At 4 weeks                                           | 387.3 ± 165.4<br>( <i>n</i> = 3)               | <i>p</i> = 0.1088                                                | 662.0 ± 619.4<br>( <i>n</i> = 2)               | <i>p</i> = 0.1797                                                | <i>p</i> = 0.5637                                       |
| Serum LDH, mean ± SD, U/L                            |                                                |                                                                  |                                                |                                                                  |                                                         |
| At start of maintenance<br>treatment                 | 332.5 ± 84.1<br>( <i>n</i> = 2)                | -                                                                | 303.0 ± 86.0<br>( <i>n</i> = 3)                | -                                                                | <i>p</i> = 0.5637                                       |
| At 4 weeks                                           | 243.0 ± 32.5<br>( <i>n</i> = 2)                | -                                                                | 273.5 ± 71.4<br>( <i>n</i> = 2)                | <i>p</i> = 0.6547                                                | <i>p</i> = 0.4386                                       |
| Serum TARC, mean ± SD,<br>pg/mL                      |                                                |                                                                  |                                                |                                                                  |                                                         |
| At start of maintenance<br>treatment                 | 504.0 ± 238.5<br>( <i>n</i> = 4)               | -                                                                | 918.0 ± 664.2<br>( <i>n</i> = 3)               | -                                                                | <i>p</i> = 0.4795                                       |
| At 4 weeks                                           | 703.0 ± 256.6<br>( <i>n</i> = 3)               | <i>p</i> = 0.1088                                                | 1689.0 ± 1156.8<br>( <i>n</i> = 2)             | <i>p</i> = 0.1797                                                | <i>p</i> = 0.2482                                       |
| Corticosteroid-related<br>parameters                 |                                                |                                                                  |                                                |                                                                  |                                                         |
| Serum cortisol, mean ± SD,<br>μg/dL                  |                                                |                                                                  |                                                |                                                                  |                                                         |
| At start of maintenance<br>treatment                 | 3.13 ± 1.64<br>( <i>n</i> = 3)                 | -                                                                | 6.24 ± 1.08<br>( <i>n</i> = 2)                 | -                                                                | <i>p</i> = 0.0832                                       |
| At 4 weeks                                           | 3.13 ± 1.38<br>( <i>n</i> = 2)                 | <i>p</i> = 0.1797                                                | 4.87 ± 2.07<br>( <i>n</i> = 2)                 | <i>p</i> = 0.6547                                                | <i>p</i> = 0.4386                                       |
| ACTH, mean ± SD, pg/mL                               |                                                |                                                                  |                                                |                                                                  |                                                         |
| At start of maintenance<br>treatment                 | 18.7 ± 12.7<br>( <i>n</i> = 2)                 | -                                                                | 28.4 ± 8.7<br>( <i>n</i> = 2)                  | -                                                                | <i>p</i> = 0.4386                                       |
| At 4 weeks                                           | 8.4<br>( <i>n</i> = 1)                         | -                                                                | 16.7 ± 2.0<br>( <i>n</i> = 2)                  | <i>p</i> = 0.1797                                                | <i>p</i> = 0.2207                                       |

*p*<sup>†</sup>: Wilcoxon signed rank-sum test, *p*<sup>‡</sup>: Wilcoxon rank-sum test.

Abbreviations: ACTH, adrenocorticotrophic hormone; IgE, immunoglobulin E; LDH, lactate dehydrogenase; SD, standard deviation; TARC, thymus and activation-regulated chemokine.
