# Supplementary material for: Proactive versus Rank-Down Topical Corticosteroid Therapy for Maintenance of Remission in Pediatric Atopic Dermatitis: A Randomized, Open-Label, Active-Controlled, Parallel-Group Study (Anticipate Study)
Source: J Clin Med. 2022 Oct 31;11(21):6477. doi: 10.3390/jcm11216477 (PMC9658234; doi:10.3390/jcm11216477)
Supplement: Supplementary file 1 [file jcm-11-06477-s001.zip › SuppInfo_Supplemental Table S2.pdf]

**Supplemental Table S2.** Blood test results: Individual data.

|                                   | Total IgE<br>(IU/mL) | Peripheral<br>blood<br>eosinophil<br>count (/μL) | LDH<br>(U/L) | TARC<br>(pg/mL) | Cortisol<br>(μg/dL) | ACTH<br>(pg/mL) |
|-----------------------------------|----------------------|--------------------------------------------------|--------------|-----------------|---------------------|-----------------|
| Proactive therapy group           |                      |                                                  |              |                 |                     |                 |
| Patient 1                         |                      |                                                  |              |                 |                     |                 |
| At start of maintenance treatment | 2466.2               | 441.0                                            | —            | 856             | 2.7                 | —               |
| At 4 weeks                        | —                    | 504.0                                            | 220          | 996             | 4.1                 | —               |
| Patient 2                         |                      |                                                  |              |                 |                     |                 |
| At start of maintenance treatment | 626.7                | 136.8                                            | —            | 444             | —                   | —               |
| At 4 weeks                        | —                    | 198.0                                            | —            | 518             | —                   | —               |
| Patient 3                         |                      |                                                  |              |                 |                     |                 |
| At start of maintenance treatment | 20.0                 | 420.0                                            | 273          | 375             | 1.75                | 9.7             |
| At 4 weeks                        | —                    | 460.0                                            | 266          | 595             | 2.15                | 8.4             |
| Patient 4                         |                      |                                                  |              |                 |                     |                 |
| At start of maintenance treatment | 3280.0               | 1050.0                                           | 392          | 341             | 4.94                | 27.7            |
| At 4 weeks                        | —                    | —                                                | —            | —               | —                   | —               |
| Rank-down therapy group           |                      |                                                  |              |                 |                     |                 |
| Patient 5                         |                      |                                                  |              |                 |                     |                 |
| At start of maintenance treatment | 4310.0               | 790.0                                            | 346          | 1646            | 5.48                | 22.2            |
| At 4 weeks                        | —                    | 1100.0                                           | 324          | 2507            | 6.33                | 15.3            |
| Patient 6                         |                      |                                                  |              |                 |                     |                 |
| At start of maintenance treatment | 370.0                | 12.3                                             | 359          | 345             | —                   | —               |
| At 4 weeks                        | —                    | —                                                | —            | —               | —                   | —               |
| Patient 7                         |                      |                                                  |              |                 |                     |                 |
| At start of maintenance treatment | 91.4                 | 138.0                                            | 204          | 763             | 7.0                 | 34.5            |
| At 4 weeks                        | —                    | 224.0                                            | 223          | 871             | 3.4                 | 18.1            |

Abbreviations: ACTH, adrenocorticotrophic hormone; IgE, immunoglobulin E; LDH, lactate dehydrogenase; SD, standard deviation; TARC, thymus and activation-regulated chemokine.
